# Supplementary material
Source: PubMed Central journal article supplement (PMC329515)
Supplement: eukcell_3_1_221__1.pdf [file eukcell_3_1_221__1.pdf]

## Supplementary tables

Table 1. Supplement<sup>a</sup>.

<sup>a</sup> Genes whose expression was up-regulated at least 4-fold in a *snf3Δ rgt2Δ* null mutant after shift from galactose to glucose.

| ORF            | Gene Name    | Gal: <i>rgt1Δ</i> | Gal: <i>rgtΔ</i> | Gal: <i>snf3Δ</i> | GLU: <i>rgt2Δ snf3Δ</i> | Known regulation                                   | References |
|----------------|--------------|-------------------|------------------|-------------------|-------------------------|----------------------------------------------------|------------|
| <i>YKL217W</i> | <i>JEN1</i>  | 0.6               | 3.1              | 0.8               | 23.1                    | Glucose-repressed; Cat8-dependent Mig1/Mig2 target | (3)        |
| <i>YBR020W</i> | <i>GAL1</i>  | 1.0               | 1.0              | 1.1               | 19.0                    | Glucose-repressed; Mig1 target                     | (4)        |
| <i>YBR019C</i> | <i>GAL10</i> | 1.2               | 1.4              | 1.2               | 17.1                    | Glucose-repressed; Mig1 target                     | (3)        |
| <i>YIL162W</i> | <i>SUC2</i>  | 0.9               | 2.4              | 1.1               | 12.8                    | Glucose-repressed; Mig1/Mig2 target                | (4)        |
| <i>YBR018C</i> | <i>GAL7</i>  | 1.0               | 1.9              | 1.6               | 12.1                    | Glucose-repressed                                  | (4)        |
| <i>YEL021W</i> | <i>URA3</i>  | 1.0               | 1.0              | 8.5               | 11.5                    | Deletion marker of SNF3 knock-out: <b>control</b>  | -          |
| <i>YER067W</i> |              | 0.6               | 1.9              | 0.4               | 9.7                     | Glucose-repressed                                  | (3)        |
| <i>YMR145C</i> | <i>NDE1</i>  | 1.0               | 2.1              | 2.2               | 9.5                     | Glucose-repressed                                  | (3)        |
| <i>YKL148C</i> | <i>SDH1</i>  | 0.9               | 1.4              | 1.5               | 9.1                     | Glucose-repressed                                  | (3)        |
| <i>YBL043W</i> | <i>ECM13</i> | 0.9               | 1.1              | 1.2               | 9.0                     | Glucose-repressed                                  | (3)        |

|                  |              |     |     |     |     |                   |     |
|------------------|--------------|-----|-----|-----|-----|-------------------|-----|
| <i>YKL109W</i>   | <i>HAP4</i>  | 0.8 | 2.6 | 0.9 | 8.5 | Glucose-repressed | (3) |
| <i>YJR004C</i>   | <i>SAG1</i>  | 0.8 | 0.5 | 2.0 | 8.3 | Alpha-agglutinin  | -   |
| <i>YMR081C</i>   | <i>ISF1</i>  | 0.4 | 4.1 | 0.3 | 8.3 | Glucose-repressed | (3) |
| <i>YBR297W*</i>  | <i>MAL33</i> | 0.5 | 1.8 | 1.1 | 8.1 | Glucose-repressed | (3) |
| <i>YHR033W*</i>  |              | 0.3 | 3.6 | 1.0 | 7.8 | Glucose-repressed | (3) |
| <i>YKL085W</i>   | <i>MDH1</i>  | 0.9 | 2.1 | 1.3 | 7.2 | Glucose-repressed | (3) |
| <i>YDL079C*</i>  | <i>MRK1</i>  | 0.2 | 1.4 | 1.3 | 6.7 | Glucose-repressed | (3) |
| <i>YIL057C</i>   |              | 0.9 | 1.0 | 1.0 | 6.4 | Glucose-repressed | (3) |
| <i>YLL041C</i>   | <i>SDH2</i>  | 0.9 | 1.7 | 0.9 | 6.4 | Glucose-repressed | (3) |
| <i>YML091C</i>   | <i>RPM2</i>  | 0.9 | 1.5 | 0.9 | 6.3 | Glucose-repressed | (3) |
| <i>YJR048W</i>   | <i>CYC1</i>  | 0.9 | 1.6 | 1.0 | 6.0 | Glucose-repressed | (3) |
| <i>YML120C</i>   | <i>NDI1</i>  | 1.0 | 1.4 | 0.6 | 5.9 | Glucose-repressed | (3) |
| <i>YLR304C</i>   | <i>ACO1</i>  | 1.1 | 1.2 | 1.0 | 5.8 | Glucose-repressed | (3) |
| <i>YER066C-A</i> |              | 0.7 | 1.6 | 0.9 | 5.8 | -                 | -   |
| <i>YJL045W</i>   |              | 1.0 | 1.1 | 0.9 | 5.3 | Glucose-repressed | (3) |
| <i>YBL015W</i>   | <i>ACH1</i>  | 1.1 | 1.2 | 0.9 | 5.2 | Glucose-repressed | (3) |

|                  |                        |     |     |     |     |                     |     |
|------------------|------------------------|-----|-----|-----|-----|---------------------|-----|
| <i>YNR001C</i>   | <i>CIT1</i>            | 1.0 | 1.3 | 0.5 | 5.2 | Glucose-repressed   | (3) |
| <i>YPR191W</i>   | <i>QCR2</i>            | 1.1 | 1.7 | 1.0 | 5.2 | Glucose-repressed   | (3) |
| <i>YBL045C</i>   | <i>COR1</i>            | 0.8 | 1.8 | 0.9 | 5.2 | Glucose-repressed   | (3) |
| <i>YDL181W</i>   | <i>INH1</i>            | 0.8 | 2.3 | 1.3 | 4.6 | Glucose-repressed   | (3) |
| <i>YDR322C-A</i> | <i>TIM11</i>           | 0.8 | 1.6 | 1.2 | 4.6 | -                   | -   |
| <i>YEL024W</i>   | <i>RIP1</i>            | 0.9 | 1.6 | 0.9 | 4.6 | Glucose-repressed   | (3) |
| <i>YOR136W</i>   | <i>IDH2</i>            | 1.0 | 1.6 | 0.9 | 4.6 | Glucose-repressed   | (3) |
| <i>YLR038C</i>   | <i>COX12</i>           | 0.8 | 2.1 | 1.3 | 4.5 | Glucose-repressed   | (3) |
| <i>YGL187C</i>   | <i>COX4</i>            | 1.0 | 1.8 | 1.2 | 4.5 | Glucose-repressed   | (3) |
| <i>YOR065W</i>   | <i>CYT1</i>            | 1.0 | 1.5 | 1.3 | 4.4 | Glucose-repressed   | (3) |
| <i>YML090W</i>   |                        | 1.0 | 1.2 | 0.9 | 4.4 | Glucose-repressed   | (3) |
| <i>YGL188C</i>   |                        | 1.1 | 2.0 | 1.1 | 4.3 | Glucose-repressed   | (3) |
| <i>YBL030C</i>   | <i>PET9</i>            | 0.9 | 1.2 | 1.0 | 4.2 | Glucose-repressed   | (3) |
| <i>YGL089C</i>   | <i>MF(ALP<br/>HA)2</i> | 1.0 | 0.7 | 1.6 | 4.2 | Alpha mating factor | -   |
| <i>YDR148C</i>   | <i>KGD2</i>            | 1.3 | 1.2 | 1.1 | 4.1 | Glucose-repressed   | (3) |
| <i>YHR051W</i>   | <i>COX6</i>            | 0.8 | 1.6 | 1.2 | 4.1 | Glucose-repressed   | (3) |

|                  |              |     |     |     |     |                                        |     |
|------------------|--------------|-----|-----|-----|-----|----------------------------------------|-----|
| <i>YJR121W</i>   | <i>ATP2</i>  | 1.1 | 1.4 | 1.3 | 4.1 | Glucose-repressed                      | (3) |
| <i>YMR058W</i>   | <i>FET3</i>  | 1.2 | 0.9 | 1.4 | 4.1 | -                                      | -   |
| <i>YPR002W</i>   | <i>PDH1</i>  | 0.7 | 1.3 | 0.9 | 4.0 | Glucose-repressed                      | (3) |
| <i>YNL052W</i>   | <i>COX5A</i> | 1.0 | 1.9 | 1.2 | 4.0 | Glucose-repressed                      | (3) |
| <i>YDR529C</i>   | <i>QCR7</i>  | 0.9 | 2.3 | 1.0 | 3.9 | Glucose-repressed                      | (3) |
| <i>YDL004W</i>   | <i>ATP16</i> | 1.1 | 1.7 | 1.2 | 3.9 | Glucose-repressed                      | (3) |
| <i>YOR135C</i>   |              | 0.9 | 1.4 | 0.9 | 3.9 | Glucose-repressed                      | (3) |
| <i>YNL037C</i>   | <i>IDH1</i>  | 1.1 | 1.4 | 1.1 | 3.8 | Glucose-repressed                      | (3) |
| <i>YBR067C</i>   | <i>TIP1</i>  | 1.9 | 1.3 | 1.7 | 3.8 | Glucose-repressed                      | (3) |
| <i>YFR015C</i>   | <i>GSY1</i>  | 0.8 | 1.1 | 1.0 | 3.8 | Glucose-repressed                      | (3) |
| <i>YOL077W-A</i> | <i>ATP19</i> | 0.8 | 1.8 | 1.5 | 3.8 | -                                      | -   |
| <i>YBR085W</i>   | <i>AAC3</i>  | 1.1 | 1.4 | 1.1 | 3.7 | Anaerobiosis-induced                   | -   |
| <i>YFR053C</i>   | <i>HXK1</i>  | 0.9 | 1.6 | 0.5 | 3.7 | Glucose-repressed;<br>Mig1/Mig2-target | (3) |
| <i>YPR020W</i>   | <i>ATP20</i> | 0.9 | 1.9 | 1.6 | 3.7 | Glucose-repressed                      | (3) |
| <i>YPR030W</i>   | <i>CSR2</i>  | 0.5 | 1.2 | 0.8 | 3.7 | Glucose-repressed                      | (3) |

|                |             |     |     |     |     |                   |     |
|----------------|-------------|-----|-----|-----|-----|-------------------|-----|
| <i>YMR206W</i> |             | 0.5 | 1.2 | 1.2 | 3.7 | Glucose-repressed | (3) |
| <i>YNL144C</i> |             | 0.8 | 1.6 | 0.7 | 3.6 | Glucose-repressed | (3) |
| <i>YOR315W</i> |             | 1.1 | 0.9 | 1.2 | 3.5 | -                 | (3) |
| <i>YKL016C</i> | <i>ATP7</i> | 1.1 | 2.0 | 1.3 | 3.5 | Glucose-repressed | (3) |
