# Supplementary material
Source: PubMed Central journal article supplement (PMC329515)
Supplement: eukcell_3_1_221__2.pdf [file eukcell_3_1_221__2.pdf]

Table 2. Supplement<sup>a</sup>.

<sup>a</sup> Genes down-regulated in *rgt1*Δnull on galactose are often induced in *snf3*Δ *rgt2*Δ null (marked in bold) on glucose.

| YORF            | Gene Name    | Gal: <i>rgt1</i> | Glu: <i>snf3 rgt2</i> |
|-----------------|--------------|------------------|-----------------------|
| <i>YDL079C</i>  | <i>MRK1</i>  | 0.2              | <b>6.7</b>            |
| <i>YHR033 W</i> |              | 0.3              | <b>7.8</b>            |
| <i>YGL255W</i>  | <i>ZRT1</i>  | 0.4              | 1.3                   |
| <i>YMR081C</i>  | <i>ISF1</i>  | 0.4              | <b>8.3</b>            |
| <i>YBR297W</i>  | <i>MAL33</i> | 0.5              | <b>8.1</b>            |
| <i>YGR243 W</i> |              | 0.5              | <b>2.4</b>            |
| <i>YMR206W</i>  |              | 0.5              | <b>3.7</b>            |
| <i>YPR030W</i>  | <i>CSR2</i>  | 0.5              | <b>3.7</b>            |
| <i>YPR194C</i>  |              | 0.5              | 1.3                   |
| <i>YPR124W</i>  | <i>CTR1</i>  | 0.6              | 1.3                   |
| <i>YEL070W</i>  |              | 0.6              | <b>1.8</b>            |
| <i>YMR318C</i>  |              | 0.6              | 1.0                   |
| <i>YOL154W</i>  |              | 0.6              | <b>3.1</b>            |
| <i>YKL217W</i>  | <i>JEN1</i>  | 0.6              | <b>23.1</b>           |
| <i>YOL002C</i>  |              | 0.6              | 0.8                   |
